# Supplementary material
Source: PubMed Central journal article supplement (PMC2533260)

# Supplementary Information

## Specific Adsorption of Histidine-Tagged Proteins on Silica Surfaces Modified with Ni<sup>2+</sup>:NTA- Derivatized Poly(Ethylene Glycol)

Eunah Kang<sup>1</sup>, Jin-won Park<sup>2</sup>, Scott McClellan<sup>2</sup>, Jong-Mok Kim<sup>4</sup>, David Holland<sup>4</sup>,  
Gil U. Lee<sup>2\*</sup>, Elias Franses<sup>2\*</sup>, Kinam Park<sup>1,3\*</sup> and David H. Thompson<sup>4\*</sup>

<sup>1</sup>School of Biomedical Engineering, <sup>2</sup>School of Chemical Engineering, <sup>3</sup>Department of  
Pharmaceutics, and <sup>4</sup>Department of Chemistry  
Purdue University  
West Lafayette, IN 47907

## Calibration Curves

Calibration curve of normalized fluorescence intensity as a function of SA-AF surface density (A) and as a function of his<sub>6</sub>-GFP surface density (B). The fluorescence intensities observed within ten different 300 μm diameter spotted zones at each concentration (spot volume = 50 nL) were measured by laser confocal scanning microscopy using the same photomultiplier gain, iris and laser excitation energy and then averaged.

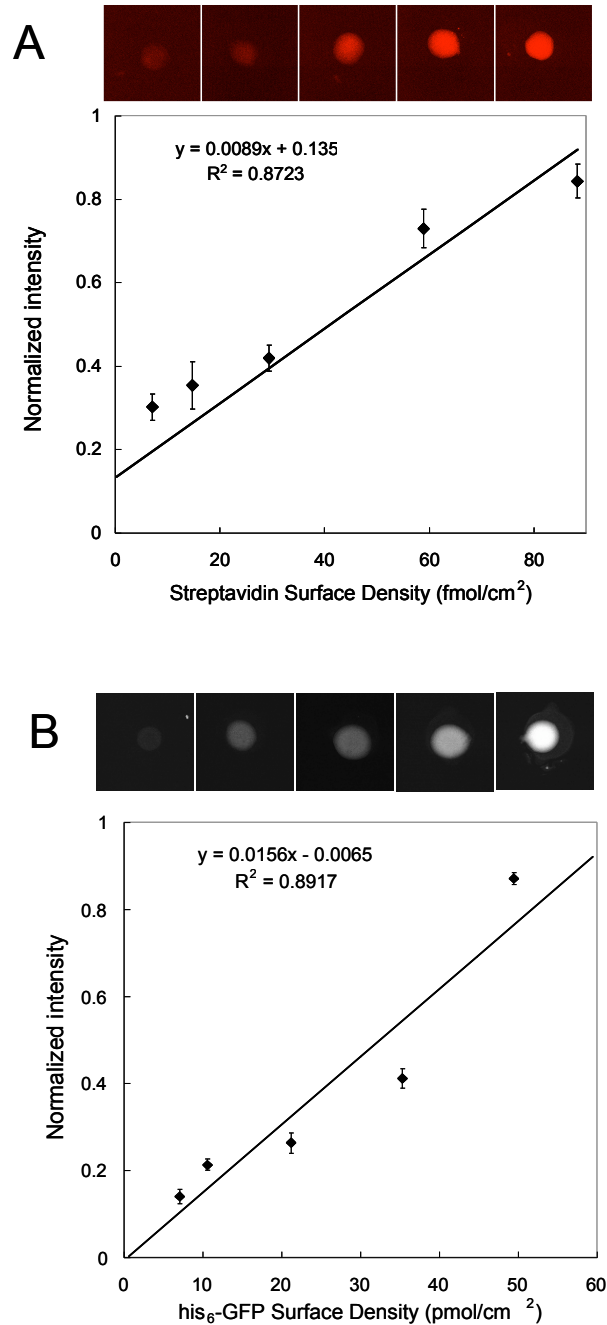

## QCM Evidence of Specific NTA: $\text{Ni}^{2+}$ :his<sub>6</sub>-GFP Binding

QCM measurement of his<sub>6</sub>-GFP adsorption onto NTA-PEG3400-Si(OMe)<sub>3</sub>-modified surfaces in the presence (A) and absence (B) of chelated  $\text{Ni}^{2+}$ .

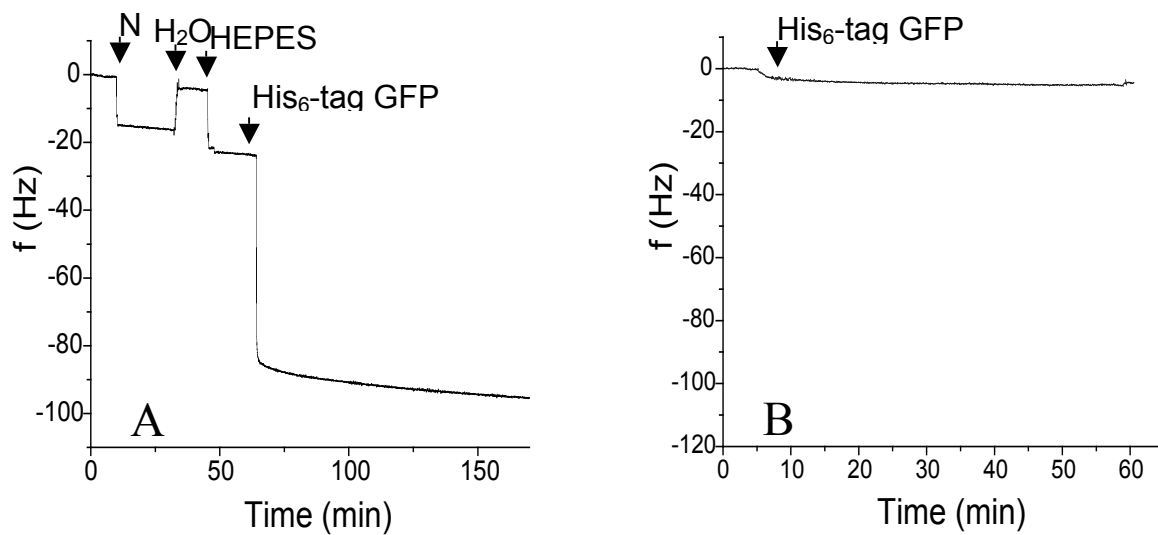

Supplement: NIHMS62306-supplement-File0021.pdf [file NIHMS62306-supplement-File0021.pdf]
